# Supplementary material for: Fast preconcentration of Pb(ii) and Cu(ii) in liquid milk by syringe solid-phase extraction using alginate and PVA biopolymer loaded with activated carbon
Source: Royal Society of Chemistry journal article supplement (doi:10.1039/d4ay02186j), 2025-01-01
Supplement: d4ay02186j2.pdf [file d4ay02186j2.pdf]

## Supplementary Material

### Fast preconcentration of Pb(II) and Cu(II) in liquid milk using syringe solid-phase extraction on alginate and PVA biopolymer loaded with activated carbon.

Ahmad Akhib Ainul Yaqin<sup>1</sup>, Suherman Suherman<sup>1</sup>, Dwi Siswanta<sup>1\*</sup>, Ahmad Hosseini-Bandegharaci<sup>2-5</sup>

<sup>1</sup>Department of Chemistry, Universitas Gadjah Mada, Sekip Utara, 55281 Yogyakarta, Indonesia

<sup>2</sup>Faculty of Chemistry, Semnan University, Semnan, Iran

<sup>3</sup>Centre of Research Impact and Outcome, Chitkara University, Rajpura, Punjab 140417, India

<sup>4</sup>University Centre for Research & Development, Chandigarh University, Mohali, Punjab 140413, India

<sup>5</sup>Department of Sustainable Engineering, Saveetha School of Engineering, SIMATS, Chennai, Tamil Nadu 602105, India

Corresponding author: [dsiswanta@ugm.ac.id](mailto:dsiswanta@ugm.ac.id)

### The data for the appendix section

#### Table

Table S1. Elemental composition in the material from EDX results

| Material                | Atom (%) |      |      |      |      |      |
|-------------------------|----------|------|------|------|------|------|
|                         | C        | O    | N    | Ca   | Pb   | Cu   |
| ACP                     | 44.6     | 40.6 | 11.7 | 2.89 | -    | -    |
| ACP after Pb adsorption | 52.9     | 34.0 | 10.8 | 1.43 | 0.81 | -    |
| ACP after Pb desorption | 47.5     | 41.8 | 10.7 | 0.03 | 0.01 | -    |
| ACP after Cu adsorption | 45.4     | 40.4 | 11.9 | 1.91 | -    | 0.46 |
| ACP after Cu desorption | 48.5     | 40.6 | 10.2 | 0.63 | -    | 0.09 |

Table S2. Results of surface area and pore volume for each material from SAA BET test.

| Material                    | Sbet<br>m <sup>2</sup> /g | Vtotal<br>cm <sup>3</sup> /g | Vmicro<br>cm <sup>3</sup> /g | Micropore<br>% | Mesopore<br>% |
|-----------------------------|---------------------------|------------------------------|------------------------------|----------------|---------------|
| Carbon                      | 587                       | 0.52                         | 0.17                         | 31.9           | 68.1          |
| ACP                         | 198                       | 0.19                         | 0.06                         | 30.1           | 69.9          |
| ACP after Pb adsorption     | 197                       | 0.19                         | 0.05                         | 29.0           | 71.0          |
| ACP after Pb desorption 10x | 454                       | 0.42                         | 0.17                         | 39.7           | 60.3          |
| ACP after Cu adsorption     | 187                       | 0.13                         | 0.04                         | 31.9           | 68.1          |
| ACP after Cu desorption 10x | 574                       | 0.49                         | 0.16                         | 33.1           | 66.9          |

S BET: Specific surface area based on Brunauer–Emmett–Teller (BET) theory calculation.

V total: Total pore volume obtained from N<sub>2</sub> sorption isotherm data at relative pressure of 0.99. V micro: Micropore volume calculated from t-plot.

Table S3. The design of optimization for Pb adsorption

| Std Run | Factor 1<br>A:pH | Factor 2<br>B:Mass ACP<br>mg | Factor 3<br>C:Cycle of sample<br>Time | Response 1<br>Adsorption<br>% |      |
|---------|------------------|------------------------------|---------------------------------------|-------------------------------|------|
| 1       | 10               | 3                            | 25                                    | 4                             | 77.7 |
| 2       | 17               | 7                            | 25                                    | 4                             | 60.3 |
| 3       | 2                | 3                            | 125                                   | 4                             | 87.5 |
| 4       | 4                | 7                            | 125                                   | 4                             | 73.7 |
| 5       | 1                | 3                            | 75                                    | 2                             | 84.3 |
| 6       | 12               | 7                            | 75                                    | 2                             | 70.7 |
| 7       | 9                | 3                            | 75                                    | 6                             | 88.8 |
| 8       | 3                | 7                            | 75                                    | 6                             | 73.2 |
| 9       | 11               | 5                            | 25                                    | 2                             | 84.3 |
| 10      | 5                | 5                            | 125                                   | 2                             | 95.8 |
| 11      | 16               | 5                            | 25                                    | 6                             | 87.8 |
| 12      | 7                | 5                            | 125                                   | 6                             | 97.9 |
| 13      | 14               | 5                            | 75                                    | 4                             | 99.8 |
| 14      | 13               | 5                            | 75                                    | 4                             | 98.8 |
| 15      | 6                | 5                            | 75                                    | 4                             | 99.3 |

|    |    |   |    |   |      |
|----|----|---|----|---|------|
| 16 | 8  | 5 | 75 | 4 | 99.5 |
| 17 | 15 | 5 | 75 | 4 | 99.3 |

---

Table S4. The design of optimization for Pb desorption

|     |     | Factor 1                | Factor 2                   | Factor 3                        | Response 1   |
|-----|-----|-------------------------|----------------------------|---------------------------------|--------------|
| Std | Run | A:Cycle of eluent times | B:Concentration HNO3 mol/L | C:Factor preconcentration times | Desorption % |
| 1   | 8   | 7                       | 0.5                        | 62.5                            | 75.2         |
| 2   | 16  | 11                      | 0.5                        | 62.5                            | 86.5         |
| 3   | 10  | 7                       | 2                          | 62.5                            | 84.7         |
| 4   | 5   | 11                      | 2                          | 62.5                            | 93.4         |
| 5   | 14  | 7                       | 1.25                       | 25                              | 86.1         |
| 6   | 4   | 11                      | 1.25                       | 25                              | 93.6         |
| 7   | 2   | 7                       | 1.25                       | 100                             | 87.5         |
| 8   | 1   | 11                      | 1.25                       | 100                             | 98.6         |
| 9   | 7   | 9                       | 0.5                        | 25                              | 86.3         |
| 10  | 6   | 9                       | 2                          | 25                              | 94.3         |
| 11  | 13  | 9                       | 0.5                        | 100                             | 89.1         |
| 12  | 9   | 9                       | 2                          | 100                             | 98.2         |
| 13  | 3   | 9                       | 1.25                       | 62.5                            | 97.7         |
| 14  | 12  | 9                       | 1.25                       | 62.5                            | 97.7         |
| 15  | 11  | 9                       | 1.25                       | 62.5                            | 97.7         |
| 16  | 15  | 9                       | 1.25                       | 62.5                            | 96.9         |
| 17  | 17  | 9                       | 1.25                       | 62.5                            | 96.8         |

Table S5. The design of optimization for Cu adsorption

|     |     | Factor 1 | Factor 2      | Factor 3             | Response 1   |
|-----|-----|----------|---------------|----------------------|--------------|
| Std | Run | A:pH     | B:Mass ACP mg | C:Cycle sample times | Adsorption % |
| 1   | 12  | 2        | 25            | 4                    | 10.3         |
| 2   | 15  | 6        | 25            | 4                    | 79.6         |
| 3   | 11  | 2        | 125           | 4                    | 18.1         |
| 4   | 1   | 6        | 125           | 4                    | 91.8         |
| 5   | 10  | 2        | 75            | 2                    | 13.6         |
| 6   | 14  | 6        | 75            | 2                    | 85.3         |
| 7   | 7   | 2        | 75            | 6                    | 19.3         |
| 8   | 4   | 6        | 75            | 6                    | 90.1         |
| 9   | 3   | 4        | 25            | 2                    | 82.6         |
| 10  | 5   | 4        | 125           | 2                    | 90.3         |
| 11  | 6   | 4        | 25            | 6                    | 86.4         |
| 12  | 16  | 4        | 125           | 6                    | 98.7         |
| 13  | 8   | 4        | 75            | 4                    | 99.1         |
| 14  | 17  | 4        | 75            | 4                    | 99.4         |
| 15  | 2   | 4        | 75            | 4                    | 99           |
| 16  | 13  | 4        | 75            | 4                    | 99.4         |
| 17  | 9   | 4        | 75            | 4                    | 99.1         |

Table S6. The design of optimization for Cu desorption

|     |     | Factor 1                | Factor 2                    | Factor 3                        | Response 1   |
|-----|-----|-------------------------|-----------------------------|---------------------------------|--------------|
| Std | Run | A:Cycle of eluent Times | B:Concentration HNO3 Mol/ L | C:Factor preconcentration Times | desorption % |
| 1   | 13  | 6                       | 0.5                         | 62.5                            | 73           |

|    |    |    |      |      |      |
|----|----|----|------|------|------|
| 2  | 8  | 10 | 0.5  | 62.5 | 80.2 |
| 3  | 2  | 6  | 2    | 62.5 | 91.4 |
| 4  | 15 | 10 | 2    | 62.5 | 97.2 |
| 5  | 4  | 6  | 1.25 | 25   | 88.2 |
| 6  | 1  | 10 | 1.25 | 25   | 94.4 |
| 7  | 17 | 6  | 1.25 | 100  | 91.2 |
| 8  | 5  | 10 | 1.25 | 100  | 99.1 |
| 9  | 10 | 8  | 0.5  | 25   | 77.3 |
| 10 | 14 | 8  | 2    | 25   | 93.4 |
| 11 | 16 | 8  | 0.5  | 100  | 80.6 |
| 12 | 9  | 8  | 2    | 100  | 98.9 |
| 13 | 12 | 8  | 1.25 | 62.5 | 96.7 |
| 14 | 11 | 8  | 1.25 | 62.5 | 96.4 |
| 15 | 3  | 8  | 1.25 | 62.5 | 96.4 |
| 16 | 6  | 8  | 1.25 | 62.5 | 96.1 |
| 17 | 7  | 8  | 1.25 | 62.5 | 96.7 |

Table S7. ANOVA for Quadratic model of Pb adsorption

| Source            | Sum of Squares | df | Mean Square | F-value | p-value                |
|-------------------|----------------|----|-------------|---------|------------------------|
| <b>Model</b>      | 2407.67        | 9  | 267.52      | 1172.59 | < 0.0001 significant   |
| A-pH              | 456.02         | 1  | 456.02      | 1998.84 | < 0.0001               |
| B-Mass ACP        | 250.88         | 1  | 250.88      | 1099.66 | < 0.0001               |
| C-Cycle of sample | 19.84          | 1  | 19.84       | 86.98   | < 0.0001               |
| AB                | 3.24           | 1  | 3.24        | 14.20   | 0.0070                 |
| AC                | 1.0000         | 1  | 1.0000      | 4.38    | 0.0746                 |
| BC                | 0.4900         | 1  | 0.4900      | 2.15    | 0.1862                 |
| A <sup>2</sup>    | 1420.87        | 1  | 1420.87     | 6227.99 | < 0.0001               |
| B <sup>2</sup>    | 160.29         | 1  | 160.29      | 702.59  | < 0.0001               |
| C <sup>2</sup>    | 12.46          | 1  | 12.46       | 54.60   | 0.0002                 |
| <b>Residual</b>   | 1.60           | 7  | 0.2281      |         |                        |
| Lack of Fit       | 1.06           | 3  | 0.3550      | 2.67    | 0.1833 not significant |
| Pure Error        | 0.5320         | 4  | 0.1330      |         |                        |
| <b>Cor Total</b>  | 2409.26        | 16 |             |         |                        |

Fit Statistics

|                  |        |                                |          |
|------------------|--------|--------------------------------|----------|
| <b>Std. Dev.</b> | 0.4776 | <b>R<sup>2</sup></b>           | 0.9993   |
| <b>Mean</b>      | 86.98  | <b>Adjusted R<sup>2</sup></b>  | 0.9985   |
| <b>C.V. %</b>    | 0.5491 | <b>Predicted R<sup>2</sup></b> | 0.9926   |
|                  |        | <b>Adeq Precision</b>          | 105.3406 |

Table S8. ANOVA for Quadratic model of Pb desorption

| Source                           | Sum of Squares | df | Mean Square | F-value | p-value              |
|----------------------------------|----------------|----|-------------|---------|----------------------|
| <b>Model</b>                     | 696.08         | 9  | 77.34       | 455.14  | < 0.0001 significant |
| A-Cycle of eluent                | 186.24         | 1  | 186.24      | 1096.02 | < 0.0001             |
| B-Concentration HNO <sub>3</sub> | 140.28         | 1  | 140.28      | 825.53  | < 0.0001             |
| C-Factor preconcentration        | 21.45          | 1  | 21.45       | 126.24  | < 0.0001             |
| AB                               | 1.69           | 1  | 1.69        | 9.95    | 0.0161               |
| AC                               | 3.24           | 1  | 3.24        | 19.07   | 0.0033               |
| BC                               | 0.3025         | 1  | 0.3025      | 1.78    | 0.2239               |

|                  |        |    |        |         |                        |
|------------------|--------|----|--------|---------|------------------------|
| A <sup>2</sup>   | 176.12 | 1  | 176.12 | 1036.44 | < 0.0001               |
| B <sup>2</sup>   | 148.69 | 1  | 148.69 | 875.00  | < 0.0001               |
| C <sup>2</sup>   | 1.31   | 1  | 1.31   | 7.70    | 0.0275                 |
| <b>Residual</b>  | 1.19   | 7  | 0.1699 |         |                        |
| Lack of Fit      | 0.3175 | 3  | 0.1058 | 0.4855  | 0.7105 not significant |
| Pure Error       | 0.8720 | 4  | 0.2180 |         |                        |
| <b>Cor Total</b> | 697.26 | 16 |        |         |                        |

---

Fit Statistics

|                  |        |                                |         |
|------------------|--------|--------------------------------|---------|
| <b>Std. Dev.</b> | 0.4122 | <b>R<sup>2</sup></b>           | 0.9983  |
| <b>Mean</b>      | 91.78  | <b>Adjusted R<sup>2</sup></b>  | 0.9961  |
| <b>C.V. %</b>    | 0.4491 | <b>Predicted R<sup>2</sup></b> | 0.9908  |
|                  |        | <b>Adeq Precision</b>          | 74.4082 |

Table S9. ANOVA for Quadratic model of Cu adsorption

| Source           | Sum of Squares | df | Mean Square | F-value   | p-value                |
|------------------|----------------|----|-------------|-----------|------------------------|
| <b>Model</b>     | 18835.17       | 9  | 2092.80     | 27510.94  | < 0.0001 significant   |
| A-pH             | 10188.78       | 1  | 10188.78    | 1.339E+05 | < 0.0001               |
| B-Mass ACP       | 200.00         | 1  | 200.00      | 2629.11   | < 0.0001               |
| C-Cycle sample   | 64.41          | 1  | 64.41       | 846.72    | < 0.0001               |
| AB               | 4.84           | 1  | 4.84        | 63.62     | < 0.0001               |
| AC               | 0.2025         | 1  | 0.2025      | 2.66      | 0.1468                 |
| BC               | 5.29           | 1  | 5.29        | 69.54     | < 0.0001               |
| A <sup>2</sup>   | 7907.95        | 1  | 7907.95     | 1.040E+05 | < 0.0001               |
| B <sup>2</sup>   | 147.19         | 1  | 147.19      | 1934.89   | < 0.0001               |
| C <sup>2</sup>   | 60.40          | 1  | 60.40       | 794.00    | < 0.0001               |
| <b>Residual</b>  | 0.5325         | 7  | 0.0761      |           |                        |
| Lack of Fit      | 0.3925         | 3  | 0.1308      | 3.74      | 0.1176 not significant |
| Pure Error       | 0.1400         | 4  | 0.0350      |           |                        |
| <b>Cor Total</b> | 18835.70       | 16 |             |           |                        |

---

Fit Statistics

|                  |        |                                |          |
|------------------|--------|--------------------------------|----------|
| <b>Std. Dev.</b> | 0.2758 | <b>R<sup>2</sup></b>           | 1.0000   |
| <b>Mean</b>      | 74.24  | <b>Adjusted R<sup>2</sup></b>  | 0.9999   |
| <b>C.V. %</b>    | 0.3715 | <b>Predicted R<sup>2</sup></b> | 0.9997   |
|                  |        | <b>Adeq Precision</b>          | 419.9620 |

Table S8. ANOVA for Quadratic model of Cu desorption

| Source                           | Sum of Squares | df | Mean Square | F-value | p-value              |
|----------------------------------|----------------|----|-------------|---------|----------------------|
| <b>Model</b>                     | 1076.94        | 9  | 119.66      | 1232.70 | < 0.0001 significant |
| A-Cycle of eluent                | 91.80          | 1  | 91.80       | 945.71  | < 0.0001             |
| B-Concentration HNO <sub>3</sub> | 609.01         | 1  | 609.01      | 6273.78 | < 0.0001             |
| C-Factor preconcentration        | 34.03          | 1  | 34.03       | 350.58  | < 0.0001             |
| AB                               | 0.4900         | 1  | 0.4900      | 5.05    | 0.0595               |
| AC                               | 0.7225         | 1  | 0.7225      | 7.44    | 0.0294               |
| BC                               | 1.21           | 1  | 1.21        | 12.47   | 0.0096               |
| A <sup>2</sup>                   | 29.96          | 1  | 29.96       | 308.64  | < 0.0001             |
| B <sup>2</sup>                   | 293.04         | 1  | 293.04      | 3018.82 | < 0.0001             |

|                  |         |    |        |       |                        |
|------------------|---------|----|--------|-------|------------------------|
| C <sup>2</sup>   | 1.36    | 1  | 1.36   | 13.97 | 0.0073                 |
| <b>Residual</b>  | 0.6795  | 7  | 0.0971 |       |                        |
| Lack of Fit      | 0.4275  | 3  | 0.1425 | 2.26  | 0.2234 not significant |
| Pure Error       | 0.2520  | 4  | 0.0630 |       |                        |
| <b>Cor Total</b> | 1077.62 | 16 |        |       |                        |

Fit Statistics

|                  |                       |                                |          |
|------------------|-----------------------|--------------------------------|----------|
| <b>Std. Dev.</b> | 0.3116                | <b>R<sup>2</sup></b>           | 0.9994   |
| <b>Mean</b>      | 91.01                 | <b>Adjusted R<sup>2</sup></b>  | 0.9986   |
| <b>C.V. %</b>    | 0.3423                | <b>Predicted R<sup>2</sup></b> | 0.9933   |
|                  | <b>Adeq Precision</b> |                                | 109.2766 |

*Figure*

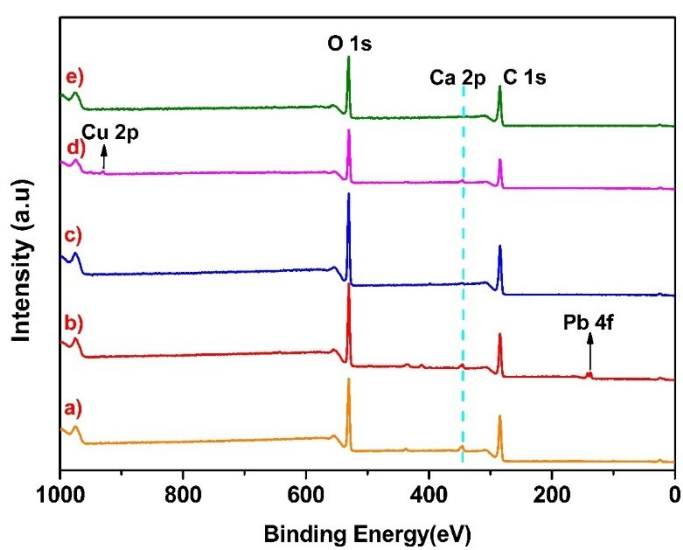

*Figure S1. The XPS survey from ACP before and after applications*
